# Supplementary material
Source: PubMed Central journal article supplement (PMC4655538)
Supplement: pnas.1512386112.sapp.pdf [file pnas.1512386112.sapp.pdf]

## Supplementary Information Appendix

### Fate of MgSiO<sub>3</sub> melts at core-mantle boundary conditions

Sylvain Petitgirard<sup>1\*</sup>, Wim J. Malfait<sup>2</sup>, Ryosuke Sinmyo<sup>1</sup>, Ilya Kupenko<sup>1,5</sup>, Louis Hennet<sup>3</sup>,  
Dennis Harries<sup>4</sup>, Thomas Dane<sup>5</sup>, Manfred Burghammer<sup>5,6</sup> and David C. Rubie<sup>1</sup>

<sup>1</sup>*Bayerisches Geoinstitut, University of Bayreuth, Bayreuth, 95490, Germany*

<sup>2</sup>*Building Energy Materials and Components, EMPA, Dübendorf, Switzerland*

<sup>3</sup>*CEMHTI, CNRS, Université d'Orléans, 1d, avenue de la Recherche Scientifique  
45071 Orléans Cedex 2 France*

<sup>4</sup>*Analytical Mineralogy of Micro- and Nanostructures, Institute of Geoscience, Friedrich  
Schiller University Jena, Carl-Zeiss-Promenade 10, Jena, 07745, Germany*

<sup>5</sup>*European Synchrotron Radiation Facility, Grenoble, France*

<sup>6</sup>*Department of Analytical Chemistry, Ghent University, B-9000 Ghent, Belgium*

\* Corresponding author: [Sylvain.petitgirard@uni-bayreuth.de](mailto:Sylvain.petitgirard@uni-bayreuth.de)

#### Sample synthesis and characterization

Glasses were obtained using an aerodynamic set-up in the CEMHTI Lab in Orleans and well described in Auzende *et al.*<sup>1</sup>. Samples were made from a mixture of oxides powder of SiO<sub>2</sub> and MgO (regent grade 99.99%) and ground in a mortar for thirty minutes to achieve a good homogenisation. One gram of the mixture was placed in a pellet die and compacted by applying a load of six tons. The recovered pellet of 1.5 mm thickness and 13 mm in diameter was broken in several parts. A piece of 25 mg was selected and placed in the levitation nozzle to form the glass sphere. An argon flow maintained the compacted powder in levitation, and a CO<sub>2</sub> laser beam was then progressively ramped up to 15% of its maximum power onto the sample (Fig. S1a). A camera and pyrometer helped to monitor the behaviour of the sample while heating up. To completely melt the sample, we had to overshoot the temperature up to 2173 K. The complete melting of the sample was easily identified both with the pyrometer and the live imaging (Fig. S1b). When the sample was entirely molten, the temperature dropped by 200 K and reached a stable plateau at ~1973 K. In the live image, the melting was identified when the sphere passed from an unstable shaky stage to a nice stable sphere. The temperature plateau was kept for 20 seconds; the laser power was then turned off and the sample quenched to room temperature (Fig. S1b). Thanks to the containerless levitation setup, and the resulting absence of nucleation sites, crystallization was avoided during cooling and the samples were quenched into glasses<sup>1</sup>.

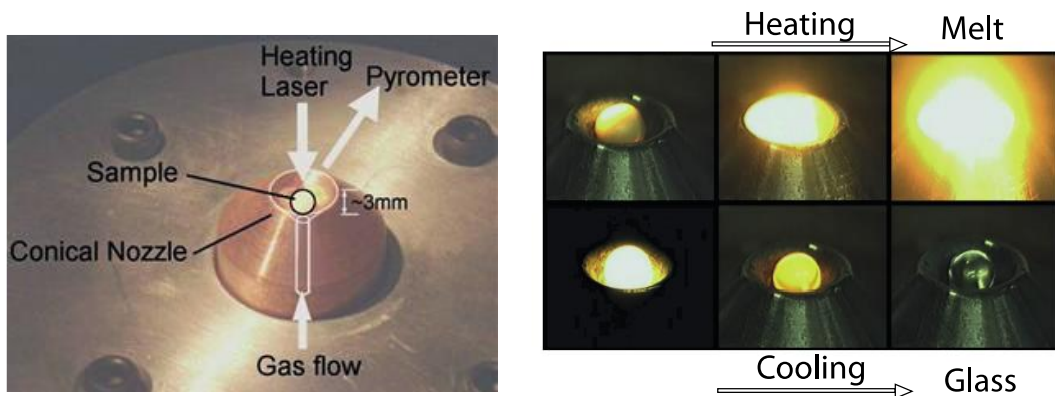

40  
 41 Figure S1. Pictures describing the aerodynamic levitation method to produce homogenous glasses.  
 42 On the left side, a detailed view and working principal of the aerodynamic levitation chamber is  
 43 shown. The compressed pellet of oxide powder is levitated with an argon flow while a high-power  
 44 CO<sub>2</sub> laser melts the entire sample. It is then is rapidly quenched by turning off the power of the laser.  
 45 Right side, pictures of the melting and quenching process (adapted from Benmore 2012<sup>2</sup>).

46  
 47  
 48 One of the spheres was mounted in epoxy and polished for electron microprobe analysis. We  
 49 carried out a profile analysis and found a constant and homogenous composition for the glass  
 50 (Table S1). The determined composition (Mg<sub>0.98</sub>Si<sub>1.02</sub>O<sub>3</sub>) is close to the nominal MgSiO<sub>3</sub>  
 51 composition.

52  
 53

| <i>SiO<sub>2</sub> (mol%)</i> | <i>MgO (mol%)</i> | <i>total</i> |
|-------------------------------|-------------------|--------------|
| 50.53                         | 49.41             | 99.94        |
| 50.61                         | 49.33             | 99.94        |
| 50.37                         | 49.57             | 99.94        |
| 50.69                         | 49.27             | 99.95        |
| 50.92                         | 49.02             | 99.94        |
| 50.69                         | 49.25             | 99.94        |
| 50.80                         | 49.15             | 99.95        |
| 50.75                         | 49.22             | 99.96        |
| 50.83                         | 49.10             | 99.93        |
| 50.92                         | 49.03             | 99.95        |
| 51.05                         | 48.89             | 99.94        |
| 50.86                         | 49.08             | 99.95        |
| 51.03                         | 48.92             | 99.94        |
| 50.95                         | 49.01             | 99.96        |
| 50.56                         | 49.39             | 99.95        |
| <i>Average</i>                |                   |              |
| 50.77                         | 49.18             | 99.95        |

54  
 55 Table S1. Chemical composition of the MgSiO<sub>3</sub> sphere along its diameter analysed using a JEOL  
 56 JXA-8200 electron probe microanalyser installed at BGI and operating at 15 kV, 5 nA and a beam  
 57 diameter of 30 μm.

58  
 59

## 60 Sample preparation and Diamond Anvil Cell loadings

61

62 For all the experiments, we used BX-90 type<sup>3</sup> Diamond Anvil Cells (DAC), which allow  
63 radial access to the sample. We investigated the full pressure range (0-130 GPa) using two  
64 experimental approaches, and prepared two types of Diamond Anvil Cell loadings:

65 1- For pressures above 30 GPa, we used diamonds of 150  $\mu\text{m}$  culets with 300  $\mu\text{m}$  bevel.  
66 After pre-indentation to 20  $\mu\text{m}$  thickness, a hole of 60  $\mu\text{m}$  was drilled in the beryllium  
67 gasket and filled with finely ground  $\text{MgSiO}_3$  glass. The full compaction of the sample  
68 is obtained at around 10-15 GPa, and the lowest compression part cannot be  
69 investigated with this technique.

70

71 2- To circumvent this issue for the lowest pressures from 0 to 25 GPa, we prepared discs  
72 of  $\text{MgSiO}_3$  with sharp vertical edges. A sphere of  $\text{MgSiO}_3$  was double polished down  
73 to 13  $\mu\text{m}$ . After carbon coating the surface, the sample was placed in a FEI Quanta  
74 3D focused ion beam (FIB) workstation and discs were cut from the  $\text{MgSiO}_3$  plate.  
75 We first proceeded by fast milling the discs using a gallium ion beam with a current  
76 of 50 nA at 30 keV ion energy. A fine polishing of the side of the discs at 5 nA at 30  
77 keV was then carried out in order to clean the sides and avoid any wedge shape on  
78 the side of the disc that could be problematic for finding the edges of the sample  
79 during the X-ray absorption experiment (Fig. S2b). We used diamonds of 300  $\mu\text{m}$   
80 culets. The double conical beryllium gasket was pre-indented to 30  $\mu\text{m}$  and a hole of  
81 100  $\mu\text{m}$  was drilled and used as the sample chamber. We placed a  $\text{MgSiO}_3$  disc  
82 recovered from the FIB together with a  $\sim 5$   $\mu\text{m}$  ruby spheres and we filled the  
83 chamber with a methanol:ethanol (4:1) mixture as pressure transmitting medium (Fig.  
84 S2c).

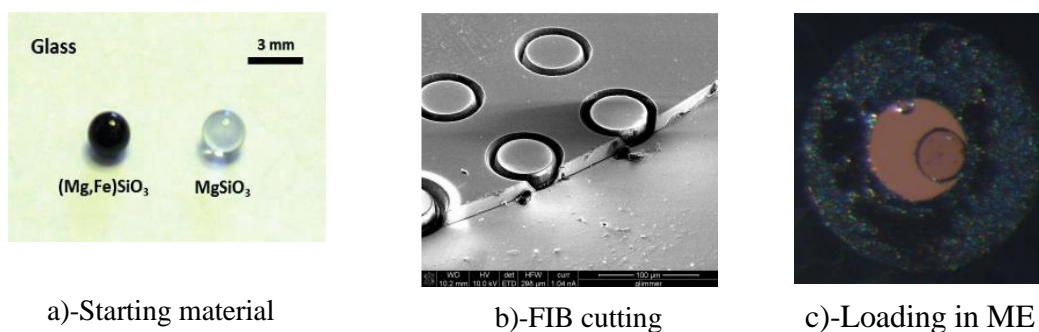

85

86 Figure S2. Details of the sample preparation for the density measurements in the DAC. a) A pure and  
87 homogenous glassy sphere of  $\text{MgSiO}_3$  is polished down to a thickness of 13  $\mu\text{m}$  and b) discs of 55  
88  $\mu\text{m}$  are cut with an FIB. c) The discs are then loaded in the beryllium gasket with a ruby sphere and  
89 methanol-ethanol is employed as pressure-transmitting medium.

90

## 91 X-ray absorption measurements

92 All measurements were conducted at ID13 beamline (ESRF, France) and we used an X-ray  
93 beam set at 13.2 keV focused down to  $2 \times 2$   $\mu\text{m}$  FWHM using beryllium Compound  
94 Reflective Lenses. A description of the beamline components and the geometry of  
95 measurements are given in Fig. S3a, S3b. To retrieve the pressure, a portable Raman system  
96 was installed at 90 degrees from the incoming X-ray beam (Fig. S3a, S3b).

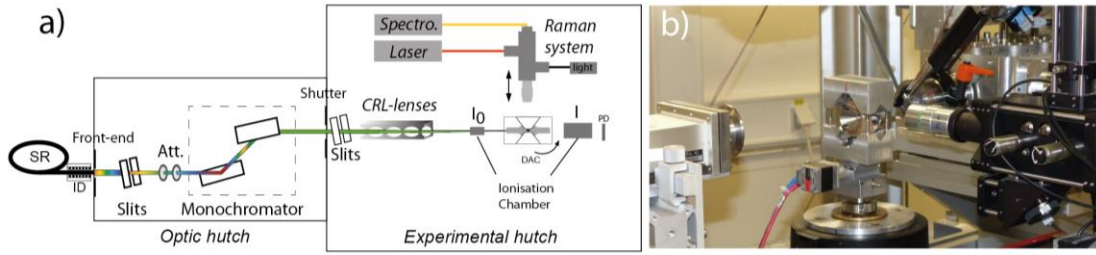

Figure S3. Details of the experimental set-up. a) Schematic drawing of the beamline components and set-up. The undulation of the synchrotron (SR) beam through the insertion device (ID) generates X-rays. In the optic hutch, the X-ray beam is pre-shaped, attenuated and a specific wavelength is selected through a double silicon 111 monochromator. In the experimental hutch, the beam is focus through a set of Be lenses and the absorption is monitored before ( $I_0$ ) and after ( $I$ ) the sample using ionisation chambers. The pressure is recorded using a portable Raman system set at 90 degrees. b) Picture of the set-up on ID13 with the DAC at the centre, the Raman head on the right side and the ionisation chamber at the back of the DAC.

97 To measure the density of  $\text{MgSiO}_3$  at very high pressure, we have adapted the X-ray  
 98 absorption technique to the confinement of the DAC. The X-ray absorption technique is  
 99 based on the attenuation of the X-rays through a path length of a material and uses the Beer-  
 100 Lambert law:

$$101 \quad -\log_{10}(I/I_0) = (\mu_{\text{HP}} \cdot x) \quad (1)$$

102  
 103 where  $\mu_{\text{HP}}$  is the attenuation coefficient of the sample and contains the absorption linked to  
 104 its environment (i.e. in our case beryllium) at high pressure,  $x$  is the path length,  $I_0$  the  
 105 intensity of the incoming beam and  $I$  the intensity of the beam after the sample. Knowing  
 106  $\mu_{\text{HP}}$ , it is then straightforward to calculate the density at high-pressure conditions as the ratios  
 107 of density over linear absorption coefficient remains the same as that at room conditions  
 108 with:

$$109 \quad \rho_{\text{HP}} / \mu_{\text{HP}} = \rho_0 / \mu_0 \quad (2)$$

110  
 111 where  $\rho_{\text{HP}}$  is the density at high pressure,  $\mu_{\text{HP}}$  is calculated from eq.(1),  $\rho_0$  and  $\mu_0$  are the  
 112 density and attenuation coefficient measured at room pressure, respectively. In order to  
 113 obtain  $\mu_{\text{HP}}$ , it is necessary to measure precisely the path length of the sample exposed to the  
 114 X-ray beam, and the intensity of the beam before and after passing through the sample. In  
 115 large volume presses, the sample is confined in a diamond capsule, and it is assumed that the  
 116 inner volume stays cylindrical at HP-HT. In the DAC, the sample is not likely to keep its  
 117 initial shape, and measuring the X-ray attenuation through the diamond is challenging, as the  
 118 sample is getting very thin. To overcome the two latter points we have used beryllium  
 119 gaskets to confine the sample to measure its absorbance in the radial geometry and by  
 120 scanning the sample in the compressional direction we retrieved its dimensions (Main text  
 121 Fig. 1). The choice of the radial geometry and the use of beryllium is motivated by two  
 122 points: i) the transmission through 3 mm of beryllium is one order of magnitude higher than  
 123 through 3 mm of diamond at 13 keV giving a higher absorption contrast and ii) measuring in  
 124 such geometry enhances the absorbance by using the maximum thickness of sample that can  
 125 be exposed to the X-rays, i.e.  $\sim 50 \mu\text{m}$ , which is also one order of magnitude higher than in  
 126 the compression axis (about  $\sim 5\text{-}15 \mu\text{m}$ ). To measure the path length and absorption, our  
 127 approach was the following:

- 128 1- We first map the sample by scanning the DAC with the compressional axis  
129 perpendicular to the X-ray beam, in this geometry, we retrieved the X-ray attenuation  
130 ( $I/I_0$ ) through the beryllium gasket (Fig. 1a,b,c main text). This step-by-step mapping  
131 is obtained in approximately 30 min.  
132
- 133 2- The DAC was then rotated by 90 degrees, and we proceeded to the mapping of the  
134 sample through the diamond, with the X-ray parallel to the compression axis. the  
135 duration of the mapping is also in the order of 30 min We could then find the path  
136 length of sample exposed to the X-rays (Fig.1d,e,f, main text).  
137
- 138 3- We combined both sets of maps to correlate the path lengths with their respective  
139 absorbance to extract the linear absorbance of the sample at high pressure (Fig.1g  
140 main text).  
141

142 Last but not least, to retrieve the density we also measured the density and absorption at  
143 room  $P$ - $T$  conditions of a standard sample. For this purpose, we measured the attenuation of  
144 a double polished  $\text{MgSiO}_3$  plate with a thickness of  $0.697 \pm 0.001$  mm using the exact same  
145 set-up. To avoid any tilting effect of the standard piece of glass, we scanned it at different  
146 angles and fit the absorbance as a function of angles (Fig. S4a). The minimum value of the  
147 fitted curve is taken as the absorbance of the sample at room conditions (Fig.S4b). The  
148 absorbance per mm ( $\mu_0$ ) is then  $0.8996 \pm 0.0016 \text{ mm}^{-1}$ . The density of the double polished  
149 glass plate was determined with the sink/float method in a diiodomethane–acetone mixture.  
150 The reproducibility for repeated measurements is better than 0.1% and the density of the  
151 glass standard was reproduced within 0.5%, and we found a value of  $2.770 \text{ g.cm}^{-3}$  ( $\rho_0$ ) for the  
152 density at ambient pressure.

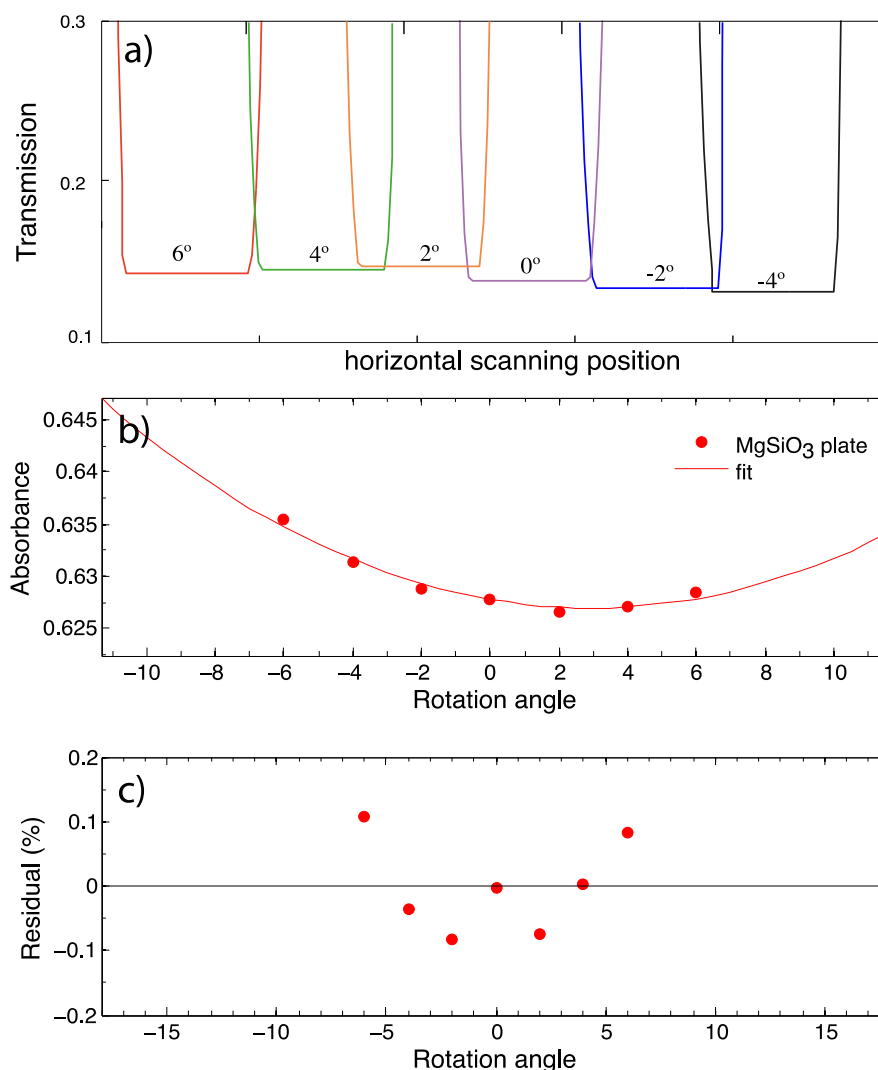

153 Figure S4. a) X-ray transmission through a 0.697 mm double polished plate of MgSiO<sub>3</sub> glass for  
 154 different angles. b) Fit of the absorbance for the different tilting angles. c) The residual values  
 155 between data and fit is less than 0.15%.  
 156

157 For pressure determination, we used a portable Raman system set at 90 degrees from the  
 158 incoming X-ray beam. For the lowest pressure we used the ruby luminescence technique<sup>4</sup>,  
 159 and for the highest pressure, we monitored the Raman signal of diamond from the diamond  
 160 culet<sup>5</sup>. For pressures between 20 and 60 GPa, we could cross-calibrate both methods, and we  
 161 obtained similar pressures within less than 1 GPa for the pressure in this regime with both  
 162 method. We could therefore assume a good confidence for the pressure determination above  
 163 60 GPa using the Raman shift as a pressure gauge. As MgSiO<sub>3</sub> is a fairly soft and  
 164 compressible material, as illustrated by the low bulk modulus of 16.9 GPa, the pressure  
 165 gradient across the sample chamber is fairly small and varies at most of  $\pm 3$  GPa for the 2  
 166 highest pressure point at  $116 \pm 3$  GPa and  $127 \pm 3$  GPa. It is to be noticed that SiO<sub>2</sub> glass is  
 167 sometime used as transmitting medium in some other literature examples, although it is not  
 168 the most hydrostatic one.

169  
 170 **Data analysis and Equation of state**

171  
 172 All the data were processed through Matlab software. The edges of the sample were  
 173 determined from the map obtained through the diamond (Fig. SI 5a). This contributes to the

174 uncertainties on the final densities: as the X-ray beam is not infinitely small, the latter  
 175 convolute with the edge of the sample. We found an error on the total path length of  $\pm 2$   
 176 microns, corresponding to  $\pm 1$  pixel, for the lowest pressures and up to  $\pm 3$  microns at high  
 177 pressure. However the individual error on each path-length are cancelled out by the high  
 178 numbers of path-lengths extracted at each pressure points and used to re-calculate the linear  
 179 absorption fig.S6. The region of interests (ROIs) corresponding to the absorption of the  
 180 sample as well as the one for the background were set using the absorption map through the  
 181 beryllium gasket by defining boxes for the background and sample area (Fig. SI 5b). For the  
 182 highest pressures investigated in this study, cupping of the diamond anvil can occur. On  
 183 figure 1f (lower panel, main text), we report a profile of the entire diamond culet at 116 GPa  
 184 and we didn't observe an increase in the absorption at the edge of this profile meaning that if  
 185 diamond cupping occurs it does not affect the absorption measurements. Indeed, an addition  
 186 of 10 microns of diamond material in the profile would change the absorption profile of only  
 187 about 0.15%, because its main constituent, carbon, has a weak absorption at 13 keV.  
 188

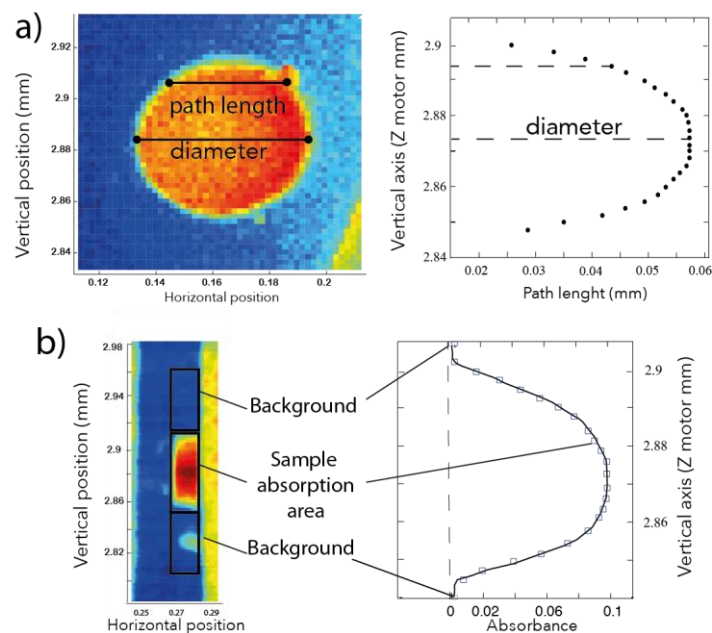

189  
 190  
 191 Figure S5. a) Selection of the rim of the sample to retrieve the path length exposed to the X-ray  
 192 beam. b) Selection of the region of interests (ROIs) for the background and sample absorption,  
 193 respectively.  
 194

195 Sets of macros repositioned both maps, for vertical coincidence, and calculated the linear  
 196 absorption (Fig 1g, main text). A correction is added to this latter value and corresponds to  
 197 the absorbance of the 3 mm of beryllium of the gasket minus the size of the hole (0.1 mm or  
 198 less depending on the pressure range). We also take into account that a part of the beryllium  
 199 is not at room conditions and has a higher density, therefore having a higher linear  
 200 absorption than at room pressure. We assumed that the amount of beryllium that can be  
 201 considered at high pressure is about 200  $\mu\text{m}$  and 250  $\mu\text{m}$  for the 300  $\mu\text{m}$  and 150/300  $\mu\text{m}$   
 202 culets diamond respectively (depending on the size of the sample chamber). We assumed an  
 203 average pressure for the beryllium between the sample pressure and room pressure, at the  
 204 side of the culet, and use the equation of state of Lazicki et al<sup>6</sup> to get its density. The linear  
 205 absorption of the 200-250  $\mu\text{m}$  of beryllium under pressure can be then calculated using the  
 206 NIST values. In any case, the correction for high-pressure beryllium changes the total value  
 207 of density of less then 0.5 %.

208  
209

| <b>Loading</b> | <b>P (GPa)</b> | <b>Density (g/cm<sup>3</sup>)</b> | <b>molar V (cm<sup>3</sup>/mol)</b> |
|----------------|----------------|-----------------------------------|-------------------------------------|
|                | 0.0            | 2.77 (1)                          | 36.24 (18)                          |
| 1              | 29 (1.5)       | 4.19 (11)                         | 23.9 (6)                            |
| 1              | 38 (1.5)       | 4.29 (11)                         | 23.4 (6)                            |
| 1              | 49 (1.5)       | 4.54 (12)                         | 21.9 (6)                            |
| 1              | 57 (1.5)       | 4.66 (13)                         | 21.3 (6)                            |
| 2              | 40 (1.5)       | 4.32 (12)                         | 22.9 (5)                            |
| 2              | 50 (2)         | 4.74 (13)                         | 21.5 (6)                            |
| 2              | 68.5 (2)       | 4.82 (13)                         | 21.0 (5)                            |
| 2              | 79 (2)         | 4.95 (13)                         | 20.3 (5)                            |
| 2              | 89.5 (2)       | 5.08 (14)                         | 19.7 (5)                            |
| 2              | 99 (2)         | 5.11 (15)                         | 19.3 (6)                            |
| 2              | 107 (2.5)      | 5.29 (16)                         | 18.95 (60)                          |
| 2              | 116 (3)        | 5.32 (21)                         | 18.8 (8)                            |
| 2              | 127 (3)        | 5.37 (21)                         | 18.7 (8)                            |
| 4              | 1.0 (5)        | 2.82 (12)                         | 35.2 (14.3)                         |
| 4              | 2.0 (5)        | 2.91 (12)                         | 34.1 (14.5)                         |
| 4              | 4.0 (5)        | 3.28 (9)                          | 30.6 (9)                            |
| 4              | 6 (1)          | 3.38 (9)                          | 29.7 (8)                            |
| 4              | 9.9 (10)       | 3.56 (10)                         | 28.2 (8)                            |
| 4              | 12 (1)         | 3.66 (10)                         | 27.5 (7.5)                          |
| 4              | 25.8 (20)      | 4.09 (11)                         | 24.3 (6)                            |
| 4              | 31 (2)         | 4.26 (11)                         | 23.54 (6)                           |
| 6              | 0.9 (2)        | 2.96 (8)                          | 35.9 (10)                           |
| 6              | 3.1 (5)        | 3.26 (9)                          | 31.3 (9)                            |
| 6              | 5.9 (5)        | 3.35 (9)                          | 29.9 (8)                            |
| 6              | 8.0 (5)        | 3.53 (9)                          | 28.8 (7)                            |
| 6              | 12.6 (5)       | 3.66 (10)                         | 27.2 (7.5)                          |
| 6              | 15.9 (10)      | 3.78 (10)                         | 26.3 (7)                            |
| 9              | 44 (.15)       | 4.41 (12)                         | 22.7 (6)                            |
| 9              | 74 (1.5)       | 4.82 (13)                         | 20.8 (5)                            |
| 9              | 80 (1.5)       | 4.92 (15)                         | 20.4 (6)                            |

210  
211  
212  
213  
214  
215

Table S2. Experimental densities, volume and pressures for the different DACs loadings. Values in brackets are the uncertainties on the pressure determination, density and volumes respectively.



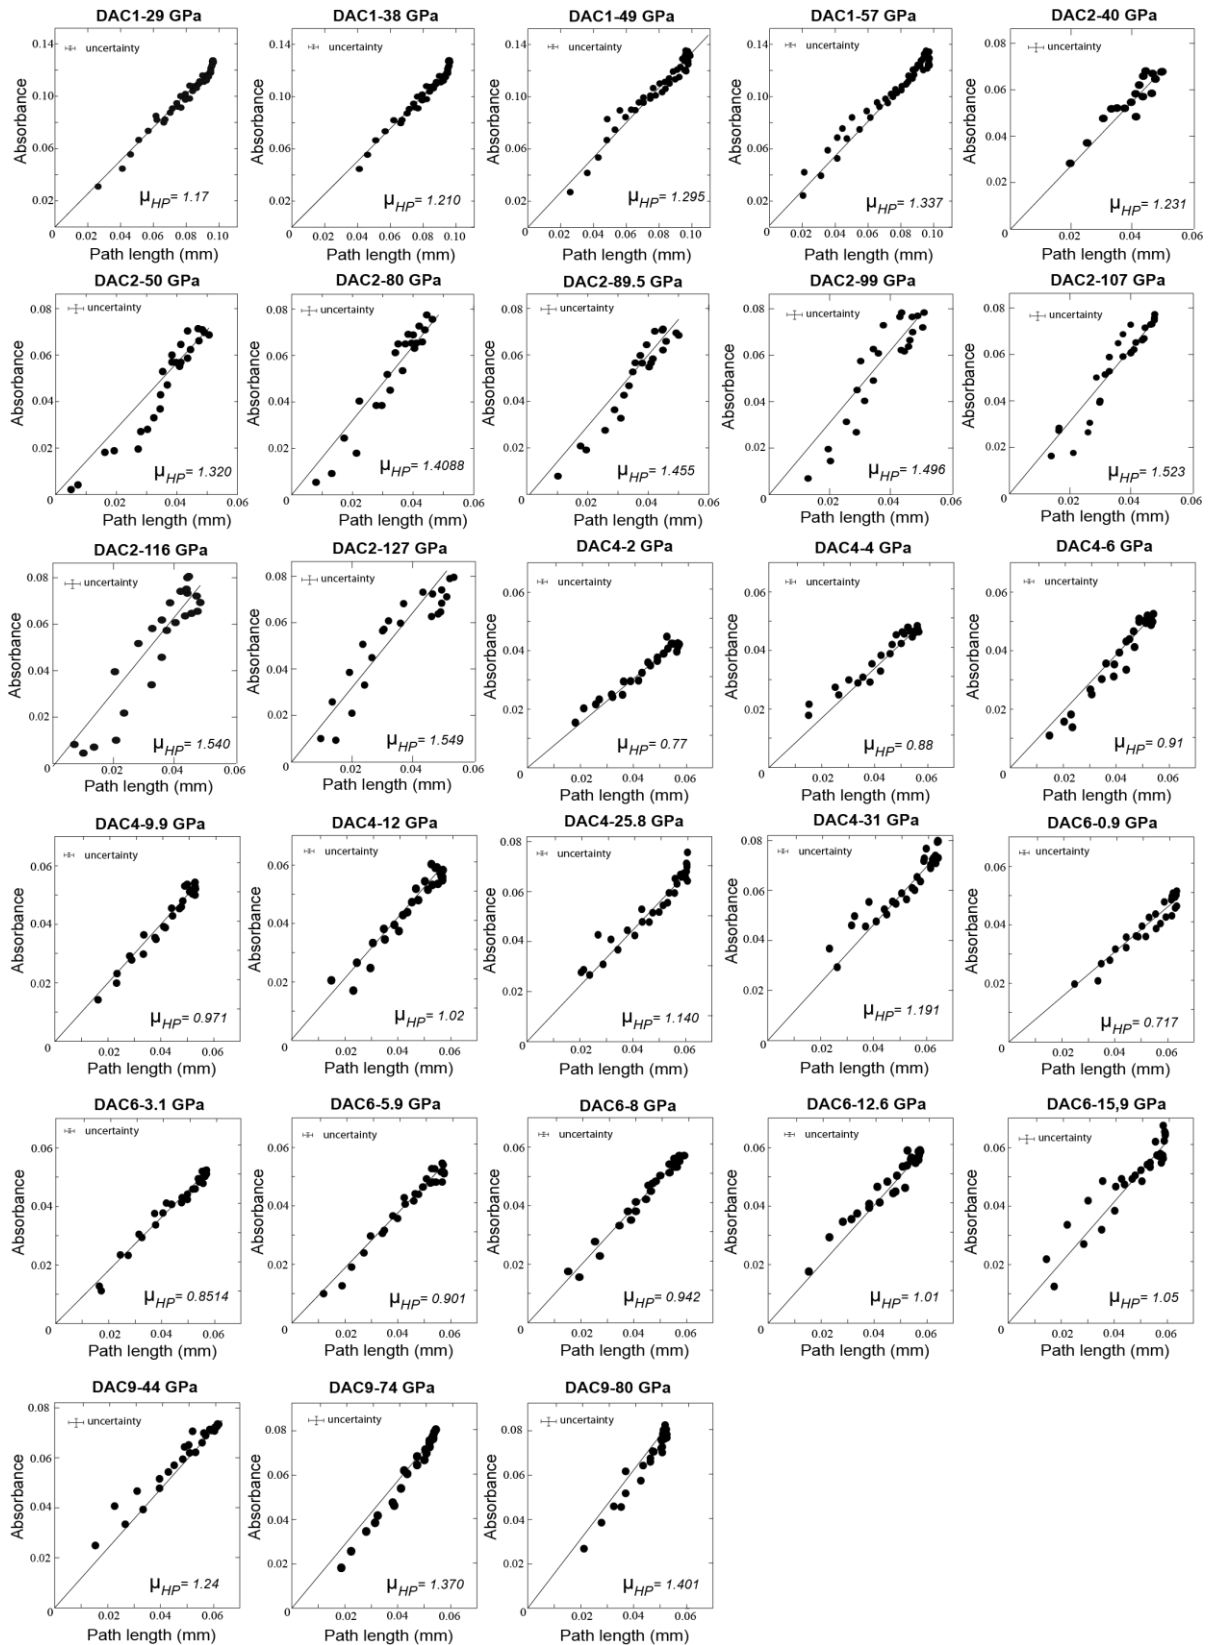

216  
 217  
 218  
 219  
 220  
 221  
 222

Figure S6. Path-length versus absorbance correlations at high pressure. Values for the absorption are given before the Be correction.

223 For the equation of state, we converted the density data into molar volume (Table S2). We  
 224 then fitted the volume as a function of pressure and found the following values for the  
 225 equation of state:  $V_0 = 36.24 \pm 0.36 \text{ cm}^3/\text{mol}$ ,  $K_{T0} = 16.9 \pm 3.2 \text{ GPa}$ ,  $K'_{T0} = 5.9 \pm 1.3$ ,  $K''_{T0} = -0.004 \pm$   
 226  $0.77 \text{ GPa}^{-1}$ . The correlations between the fit parameters are reported on Fig. S7, with a weak  
 227 correlation between  $V_0$  and  $K_{T0}$  as well between  $K_{T0}$  and  $K'_{T0}$  but a quite strong one between  
 228  $K'_{T0}$  and  $K''_{T0}$ , giving a higher uncertainty for  $K''_{T0}$ . We also reported the standard deviation  
 229 of our data compare to the calculated EoS in fig.2b and we found a deviation of  $\pm 1.2 \%$   
 230 indicating that our data are very well reproduced and described by our EoS. The 95%  
 231 confidence bands of our EoS are also reported in fig.2b illustrating the very tight confidence  
 232 intervals for the  $\text{MgSiO}_3$  EoS. Although some individual points can have larger uncertainty  
 233 (i.e. at 116 and 127 GPa), the EoS is better constrained because of the large number of points  
 234 spanning over the entire pressure range, resulting in smaller uncertainties on the EoS than on  
 235 individual measurements. Last but not least,  $V_0$  is very well constrained by the sink/float  
 236 measurement and  $K_{T0}$  is mostly determined by the points at low pressure from 0 to 40 GPa  
 237 where the uncertainties are much smaller, providing good constraints on the EoS and  
 238 improving the extrapolation to higher pressures.

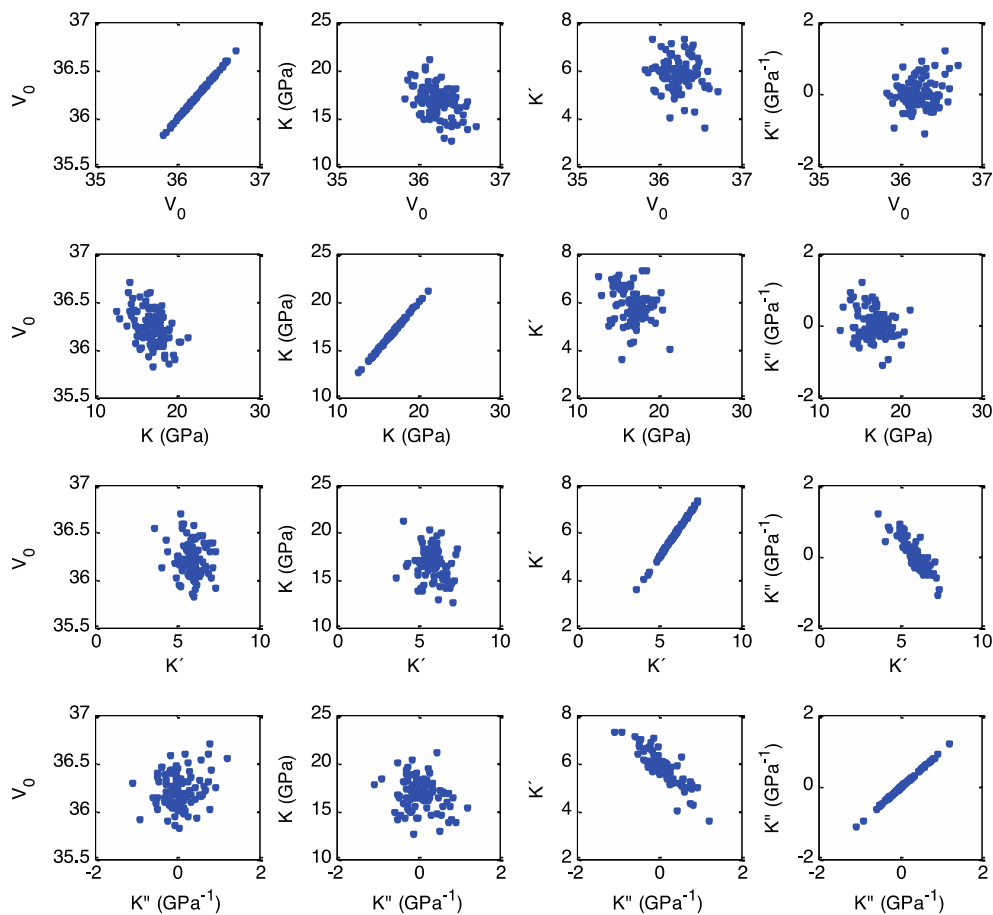

239 Figure S7. Correlation between parameters of the fourth order Birch-Murnaghan Equation of state  
 240 used to fit the data.  
 241

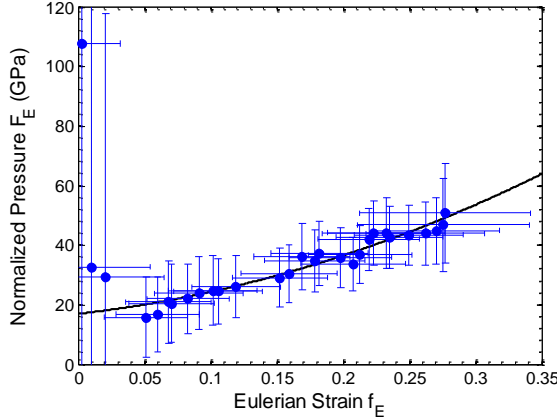

Figure S8. F-f plot of the compression data. Markers denote the experimental data, black line denotes the 4<sup>th</sup> order BM EoS fitted to the data.

242

243 The 4<sup>th</sup> order Birch-Murnaghan although not completely justify as can be seen from a F-f  
 244 plot on Fig.S8, we found that it is the best one to represent our dataset over the studied  
 245 pressure range but also gives values for  $K_{T0}$  and  $K'_{T0}$  which are the most sensible and closer  
 246 to the melt at room pressure. We also performed a Vinet fit of our data (Fig.S9) and found  
 247 values for  $K_{T0}=14.3\pm 3.3$  GPa and  $K'_{T0}=8.4\pm 1.0$  with a standard deviation of 1.5%.

248

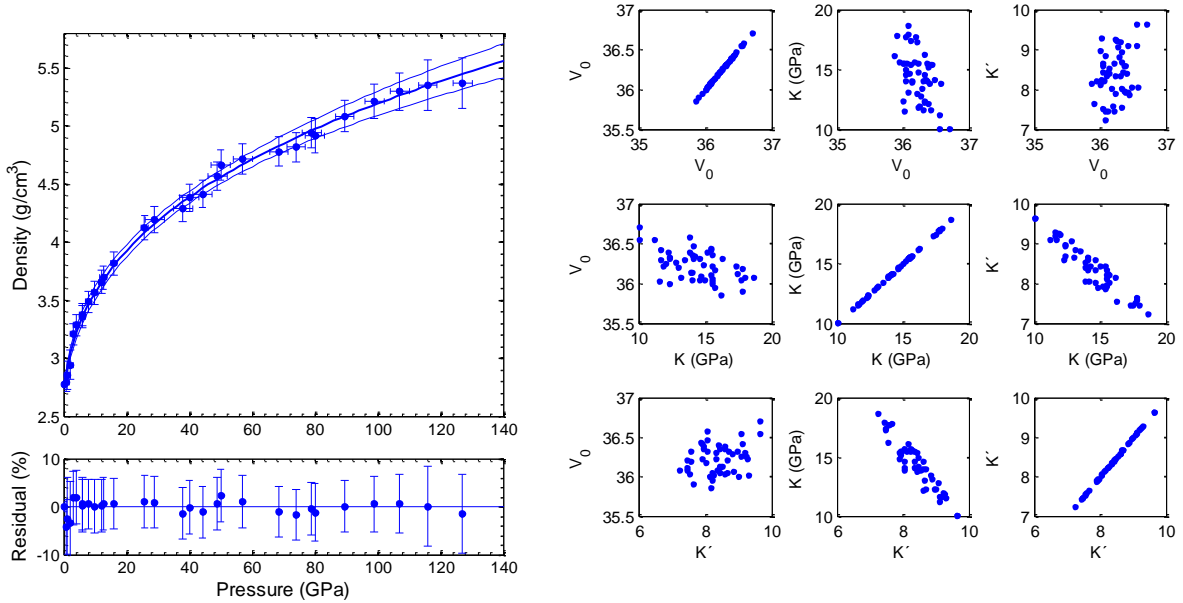

249 Figure S9. On the left side, Vinet EoS fit through the data (thick line) with 95% confidence interval  
 250 (thin lines). On the right side, Correlation between the Vinet EoS fit parameters.

251

### 252 Calculation of melts densities

253

254 From the fourth order BM equation-of-state, we could re-calculate the density of amorphous  
 255  $MgSiO_3$  at high temperature along different isotherms. We used the formula of Stixrude and  
 256 Karki 2005<sup>7</sup> to extrapolate the density of melts at high temperature with:

257

$$258 \quad P(V,T) = P_c(V,T_0) + P_{th}(V,T) = P_c(V,T_0) + \gamma C_V/V (T-T_0) \quad (3)$$

259

$$260 \quad \text{and } \gamma C_V/V (T-T_0) = \alpha K_T (T-T_0) \quad (4)$$

261 We found the values for  $\alpha K_T$  reported in de Koker and Stixrude 2009<sup>8</sup> the most appropriate  
 262 as they vary only with pressure but seem independent of the temperature. We could fit the  
 263  $\alpha K_T$  value using a power law curve (Fig.S8) (i.e. similar to the expression for gamma<sup>9</sup>).  
 264

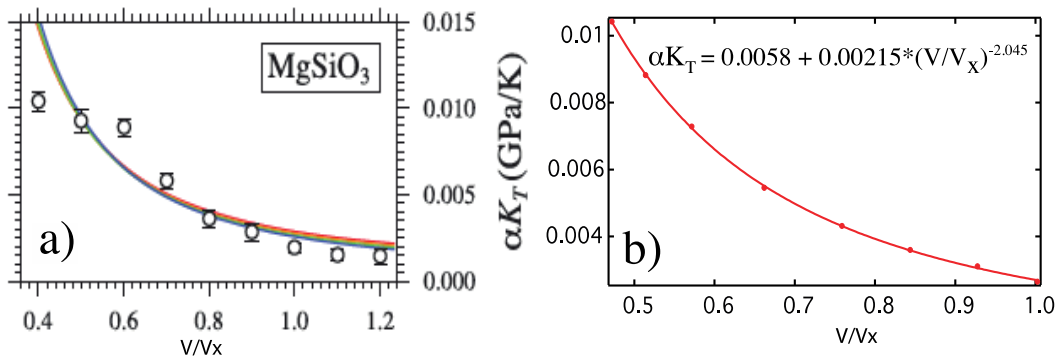

265  
 266 Figure S10. a) plot extracted from de Koker and Stixrude<sup>8</sup> b) fit of the data to obtain the thermal  
 267 expansion parameter for the high temperature calculations.  
 268

269 As mentioned in the main text and in fig.3a and using parameters from fig.S10, we found a  
 270 very close agreement with the densities calculated at 3000 K<sup>10</sup>, and at 4000 K<sup>8,9</sup>. Also  
 271 reported on fig.S11 are the data from shock experiments for similar composition<sup>11-13</sup>.  
 272 Although difficult to compare, as they do not follow an isothermal path like in the  
 273 calculations, at high pressure the densities found from shock compression on MgSiO<sub>3</sub> melts  
 274 are very close to the one we found at 4000 K. It has to be noticed, that such an agreement  
 275 between calculation, shock compression and static compression is rarely obtained in high  
 276 pressure science and gives good confidence on the very high density of glasses and melts at  
 277 very high pressure.  
 278

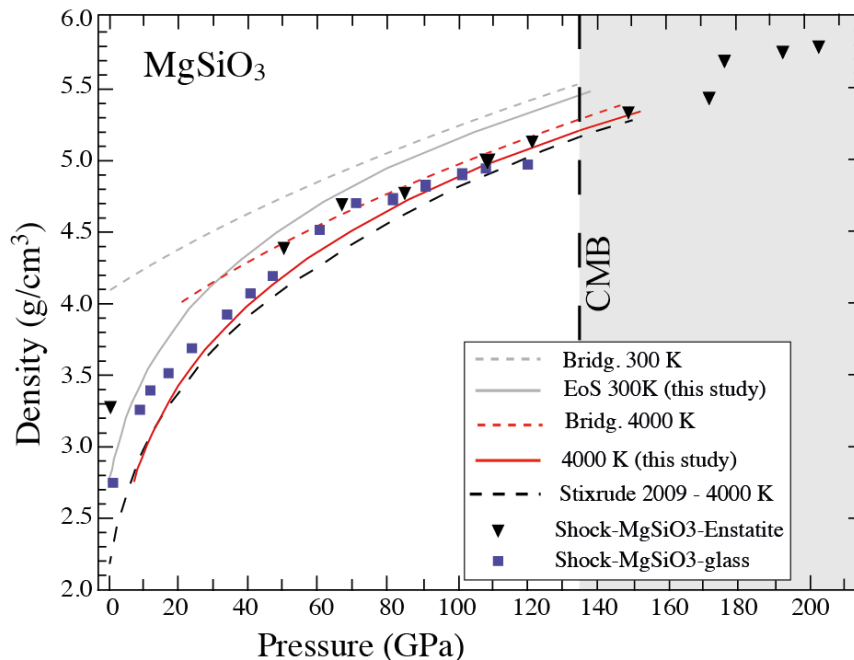

279  
 280  
 281 Figure S11. MgSiO<sub>3</sub> density data as a function of pressure from different studies. In full and dashed  
 282 grey lines, densities for MgSiO<sub>3</sub> bridgmanite and glass (this study) at 300 K respectively. In full and  
 283 dashed red lines, MgSiO<sub>3</sub> bridgmanite and melt (this study) at 4000 K respectively. The dashed black  
 284 curve is the density for MgSiO<sub>3</sub> melt at 4000 K from Stixrude et al. 2009<sup>9</sup>. The black triangles are the

285 density data for melts derived from shock experiment from enstatite starting material<sup>12</sup> and purple  
 286 squares from MgSiO<sub>3</sub> glass starting material<sup>13</sup> and where melting was observed.

287

288 **Calculation of the density crossover.**

289

290 For the density crossover calculation, we assumed a simple binary system between MgSiO<sub>3</sub>  
 291 and FeSiO<sub>3</sub>. In this case, the density contrast between the solid and liquid phase is linked to  
 292 the iron-partitioning coefficient between both phases with:

293

$$294 K_D = \{X(\text{FeSiO}_3^{\text{Sol}})/X(\text{MgSiO}_3^{\text{Sol}})\} / \{X(\text{FeSiO}_3^{\text{Liq}})/X(\text{MgSiO}_3^{\text{Liq}})\} \quad (5)$$

295

296 And the resulting densities for both the iron-enriched liquid: Mg<sub>1-x</sub>Fe<sub>x</sub>SiO<sub>3</sub><sup>Liq</sup> and the  
 297 depleted solid: Mg<sub>1-y</sub>Fe<sub>y</sub>SiO<sub>3</sub><sup>Sol</sup> can be expressed as a liner combination for the liquid: (1-x)  
 298 MgSiO<sub>3</sub><sup>Liq</sup> + x FeSiO<sub>3</sub><sup>Liq</sup> and in a same way for the solid with :(1-y) MgSiO<sub>3</sub><sup>Sol</sup> + y FeSiO<sub>3</sub><sup>Sol</sup>  
 299 We assumed a bulk composition of (Mg<sub>0.9</sub>Fe<sub>0.1</sub>)SiO<sub>3</sub> and calculated the amount of iron in  
 300 each phase, for different iron portioning coefficient ranging from 0.1 to 0.5. The composition  
 301 for each phase in eq(5) for various partitioning coefficient are reported in table S4.

302

303

| K <sub>D</sub> | Mg# (solid) | Mg# (liquid) | Mg# (bulk) |
|----------------|-------------|--------------|------------|
| 0.1            | 97.9        | 82.1         | 90         |
| 0.2            | 96.3        | 83.7         | 90         |
| 0.3            | 95.0        | 85.0         | 90         |
| 0.4            | 93.9        | 86.1         | 90         |
| 0.5            | 93.0        | 87.0         | 90         |

304

305 Table S4. Calculation of the iron content in the solid and liquid phases for different partitioning  
 306 coefficient *K<sub>D</sub>*. The calculation gives the proportion for each end-members for both the solid and  
 307 liquid phases in eq(5) expressed as Mg number (Mg#).

308

309

310 We used our density model at 4000 K to get the density of the liquid MgSiO<sub>3</sub>. For the  
 311 density of the FeSiO<sub>3</sub> liquid, we used the data computed by Ramo *et al.*<sup>14</sup> and for the solid  
 312 end-members, MgSiO<sub>3</sub> and FeSiO<sub>3</sub> respectively; we used the equation of state at 4000 K  
 313 using the parameters reported by Xu *et al.*<sup>15</sup>. The results of the density for each phases, solid  
 314 and liquid, and density contrast between resulting solid and liquid for variable partitioning of  
 315 iron are given in Table S5 and plotted in Fig.3b (main text).

316

| P<br>(GPa) | Density of Liquid-Phase (g/cm <sup>3</sup> ) |       |       |       |       | Density of Solid-Phase (g/cm <sup>3</sup> ) |       |       |       |       | Density difference (g/cm <sup>3</sup> ) |                      |                      |                      |                      |
|------------|----------------------------------------------|-------|-------|-------|-------|---------------------------------------------|-------|-------|-------|-------|-----------------------------------------|----------------------|----------------------|----------------------|----------------------|
|            | K0.1                                         | K0.2  | K0.3  | K0.4  | K0.5  | K0.1                                        | K0.2  | K0.3  | K0.4  | K0.5  | $\Delta\rho$<br>K0.1                    | $\Delta\rho$<br>K0.2 | $\Delta\rho$<br>K0.3 | $\Delta\rho$<br>K0.4 | $\Delta\rho$<br>K0.5 |
| 25         | 3.694                                        | 3.677 | 3.665 | 3.654 | 3.645 | 4.067                                       | 4.085 | 4.1   | 4.112 | 4.122 | -0.373                                  | -0.408               | -0.435               | -0.458               | -0.477               |
| 35         | 3.962                                        | 3.945 | 3.932 | 3.921 | 3.911 | 4.232                                       | 4.251 | 4.266 | 4.279 | 4.289 | -0.27                                   | -0.306               | -0.334               | -0.358               | -0.378               |
| 45         | 4.274                                        | 4.258 | 4.246 | 4.235 | 4.226 | 4.38                                        | 4.399 | 4.414 | 4.427 | 4.438 | -0.105                                  | -0.141               | -0.169               | -0.192               | -0.211               |
| 55         | 4.458                                        | 4.441 | 4.428 | 4.417 | 4.408 | 4.46                                        | 4.47  | 4.487 | 4.501 | 4.512 | -0.002                                  | -0.029               | -0.059               | -0.084               | -0.104               |
| 65         | 4.622                                        | 4.605 | 4.591 | 4.579 | 4.57  | 4.637                                       | 4.657 | 4.673 | 4.686 | 4.698 | -0.015                                  | -0.053               | -0.083               | -0.107               | -0.128               |
| 75         | 4.766                                        | 4.748 | 4.734 | 4.722 | 4.712 | 4.752                                       | 4.773 | 4.789 | 4.802 | 4.814 | 0.014                                   | -0.025               | -0.055               | -0.081               | -0.102               |
| 85         | 4.909                                        | 4.891 | 4.876 | 4.863 | 4.853 | 4.86                                        | 4.881 | 4.898 | 4.911 | 4.923 | 0.049                                   | 0.01                 | -0.022               | -0.048               | -0.07                |
| 95         | 5.029                                        | 5.009 | 4.994 | 4.981 | 4.97  | 4.962                                       | 4.983 | 5.001 | 5.014 | 5.025 | 0.066                                   | 0.026                | -0.006               | -0.033               | -0.056               |
| 105        | 5.146                                        | 5.126 | 5.11  | 5.097 | 5.085 | 5.059                                       | 5.08  | 5.097 | 5.111 | 5.123 | 0.087                                   | 0.045                | 0.012                | -0.015               | -0.038               |
| 115        | 5.256                                        | 5.236 | 5.219 | 5.205 | 5.194 | 5.151                                       | 5.173 | 5.19  | 5.204 | 5.216 | 0.105                                   | 0.063                | 0.029                | 0.001                | -0.022               |
| 125        | 5.353                                        | 5.332 | 5.315 | 5.301 | 5.289 | 5.24                                        | 5.261 | 5.279 | 5.293 | 5.305 | 0.113                                   | 0.07                 | 0.036                | 0.008                | -0.016               |
| 135        | 5.444                                        | 5.422 | 5.405 | 5.391 | 5.388 | 5.324                                       | 5.346 | 5.364 | 5.378 | 5.391 | 0.12                                    | 0.076                | 0.041                | 0.012                | -0.002               |
| 145        |                                              |       |       |       | 5.477 |                                             |       |       |       | 5.472 |                                         |                      |                      |                      | 0.005                |
| 155        |                                              |       |       |       | 5.558 |                                             |       |       |       | 5.55  |                                         |                      |                      |                      | 0.008                |

317

318 Table S5. Density contrast between solid and liquid MgFeSiO<sub>3</sub> for various iron partitioning coefficient (K). The density for the liquid phase and  
319 solid phase are calculated with different amount of iron as describe in table S4. The difference in density in the last 5 columns marks the pressure  
320 where density crossover between an iron rich liquid and an iron-depleted solid as a result of partial melting is expected.

321

322

323 **References:**

- 324 1. Auzende, A.-L. *et al.* Synthesis of amorphous MgO-rich peridotitic starting material  
325 for laser-heated diamond anvil cell experiments - application to iron partitioning in the  
326 mantle. *High Press. Res.* **31**, 199–213 (2011).
- 327 2. Benmore, C. A Review of High-Energy X-Ray Diffraction from Glasses and Liquids.  
328 *ISRN Mat. Sci.* (2012).
- 329 3. Kantor, I. *et al.* BX90: A new diamond anvil cell design for X-ray diffraction and  
330 optical measurements. *Rev. Sci. Instrum.* **83**, (2012).
- 331 4. Mao, H. K., Xu, J. & Bell, P. M. Calibration of the ruby pressure gauge to 800-kbar  
332 under quasi-hydrostatic conditions. *J. Geophys. Res.* **91**, 4673–4676 (1986).
- 333 5. Akahama, Y. & Kawamura, H. Pressure calibration of diamond anvil Raman gauge to  
334 310 GPa. *J. Appl. Phys.* **100**, (2006).
- 335 6. Lazicki, A., Dewaele, A., Loubeyre, P. & Mezouar, M. High-pressure-temperature  
336 phase diagram and the equation of state of beryllium. *Phys. Rev. B* **86**, (2012).
- 337 7. Stixrude, L. & Karki, B. Structure and freezing of MgSiO<sub>3</sub> liquid in Earth's lower  
338 mantle. *Science* (80-. ). **310**, 297–299 (2005).
- 339 8. De Koker, N. & Stixrude, L. Self-consistent thermodynamic description of silicate  
340 liquids, with application to shock melting of MgO periclase and MgSiO<sub>3</sub> perovskite.  
341 *Geophys. J. Int.* **178**, 162–179 (2009).
- 342 9. Stixrude, L., de Koker, N., Sun, N., Mookherjee, M. & Karki, B. Thermodynamics of  
343 silicate liquids in the deep Earth. *Earth Planet. Sci. Lett.* **278**, 226–232 (2009).
- 344 10. Ghosh, D. B., Karki, B. & Stixrude, L. First-principles molecular dynamics  
345 simulations of MgSiO<sub>3</sub> glass: Structure, density, and elasticity at high pressure. *Am.*  
346 *Miner.* **99**, 1304–1314 (2014).
- 347 11. Mosenfelder, J. L., Asimow, P. D., Frost, D. J., Rubie, D. C. & Ahrens, T. J. The  
348 MgSiO<sub>3</sub> system at high pressure: Thermodynamic properties of perovskite,  
349 postperovskite, and melt from global inversion of shock and static compression data.  
350 *J. Geophys. Res.* **114**, (2009).
- 351 12. Akins, J. A., Luo, S.-N., Asimow, P. D. & Ahrens, T. J. Shock induced melting of  
352 MgSiO<sub>3</sub> perovskite and implications for melts in Earth's lowermost mantle. *Geophys.*  
353 *Res. Lett.* L14612 (2003).
- 354 13. Luo, S.-N., Akins, J. A., Ahrens, T. J. & Asimow, P. D. Shock compressed MgSiO<sub>3</sub>  
355 glass, enstatite, olivine, and quartz: Optical emission, temperatures, and melting. *J.*  
356 *Geophys. Res.* **109**, B05205 (2004).
- 357 14. Ramo, D. M. & Stixrude, L. Spin crossover in Fe<sub>2</sub>SiO<sub>4</sub> liquid at high pressure.  
358 *Geophys. Res. Lett.* **41**, 4512–4518 (2014).
- 359 15. Xu, W., Lithgow-Bertelloni, C., Stixrude, L. & Ritsema, J. The effect of bulk  
360 composition and temperature on mantle seismic structure. *Earth Planet. Sci. Lett.* **275**,  
361 70–79 (2008).
- 362
